# Supplementary material for: Use of Voice-Based Conversational Artificial Intelligence for Basal Insulin Prescription Management Among Patients With Type 2 Diabetes: A Randomized Clinical Trial
Source: PubMed Central journal article supplement (PMC10692866; doi:10.1001/jamanetworkopen.2023.40232), 2023-12-01
Supplement: jamanetwopen-e2340232-s003.pdf [file jamanetwopen-e2340232-s003.pdf]

## Data Sharing Statement

Nayak. Use of Voice-Based Conversational Artificial Intelligence for Basal Insulin Prescription Management Among Patients With Type 2 Diabetes. *JAMA Netw Open*. Published November 01, 2023. doi:10.1001/jamanetworkopen.2023.40232

### Data

**Data available:** Yes

**Data types:** Deidentified participant data

**How to access data:** Requests for data can be sent to [aknayak@stanford.edu](mailto:aknayak@stanford.edu)

**When available:** With publication

### Supporting Documents

**Document types:** Statistical/analytic code, Informed consent form

**How to access documents:** [aknayak@stanford.edu](mailto:aknayak@stanford.edu)

**When available:** With publication

### Additional Information

**Who can access the data:** Anyone requesting the data

**Types of analyses:** For any purpose

**Mechanisms of data availability:** No special agreement needed
